# Supplementary material for: Neuropilin-1 Mediates SARS-CoV-2 Infection in Bone Marrow-derived Macrophages
Source: bioRxiv or medRxiv preprint supplement (doi:10.1101/2021.04.14.439793), 2021-04-19

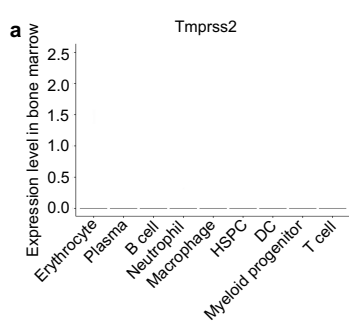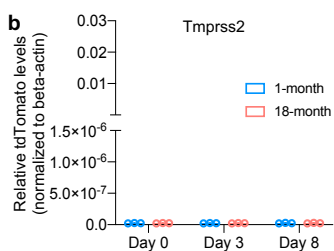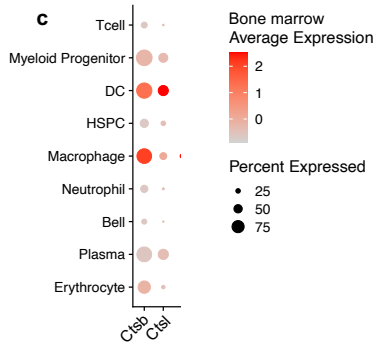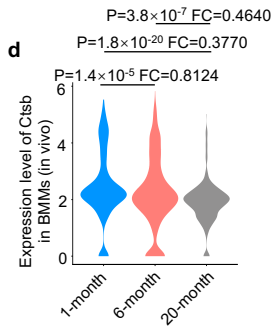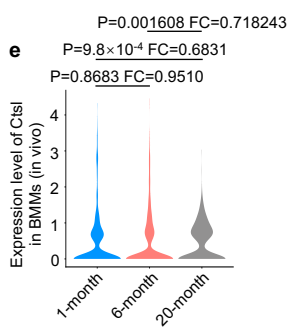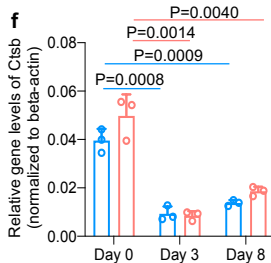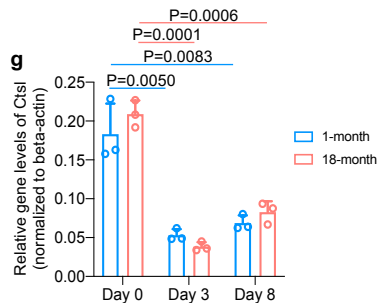

Supplement: Supplementary file [file media-4.pdf]
